# Supplementary material
Source: PubMed Central journal article supplement (PMC3186401)
Supplement: supp_M111.269001_jbc.M111.269001-1.pdf [file supp_M111.269001_jbc.M111.269001-1.pdf]

Supplementary Figure 1

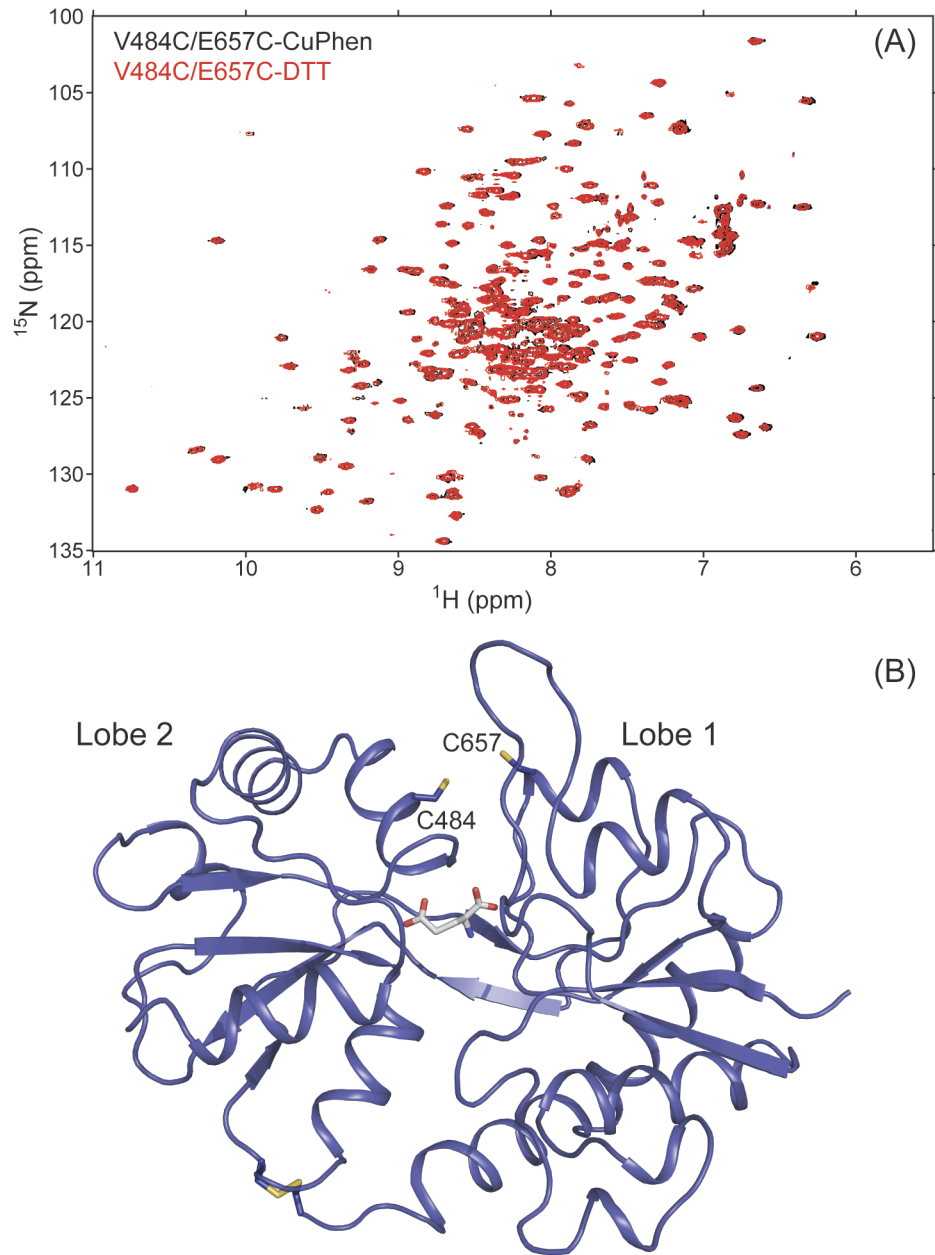

Supplemental Figure 1

Legend to Supplementary Figure 1. (A)  $^1\text{H}$ ,  $^{15}\text{N}$ -HSQC spectrum of the V484C/E657C mutation of the GluA2 LBD bound to glutamate. The reduced (DTT) and oxidized (CuPhen) spectra were identical. (B) The crystal structure (1.82 Å, R/R<sub>free</sub> = 20.8/25.5) of the double mutation clearly showed that the disulfide bond was not formed under oxidizing conditions.

**Supplemental Table 1**  
Structural Statistics of Oxidized Forms

| Structure                                  | Glutamate A452C/S652C           | IW A452C/S652C                  | Kainate A452C/S652C             | CNQX A452C/S652C                 |
|--------------------------------------------|---------------------------------|---------------------------------|---------------------------------|----------------------------------|
| Space Group                                | P22 <sub>1</sub> 2 <sub>1</sub> | P22 <sub>1</sub> 2 <sub>1</sub> | P22 <sub>1</sub> 2 <sub>1</sub> | P2 <sub>1</sub> 2 <sub>1</sub> 2 |
| Unit Cell (Å)                              | a=47.6 b=114.3 c=163.8          | a=47.8 b=114.4 c=163.5          | a=47.8 b=113.9 c=164.8          | a=114.7 b=165.2 c=47.7           |
| X-ray source                               | CHESS (A1)                      | CHESS (A1)                      | CHESS (A1)                      | CHESS (A1)                       |
| Wavelength (Å)                             | 0.977                           | 0.977                           | 0.977                           | 0.977                            |
| Resolution (Å)                             | 50-1.9 (1.93-1.90)              | 50-1.87 (1.90-1.87)             | 50.0-2.05 (2.05-2.02)           | 50.0-1.97 (2.00-1.97)            |
| Measured reflections (#)                   | 361048                          | 512266                          | 379373                          | 388141                           |
| Unique reflections (#)                     | 66721                           | 69972                           | 55053                           | 56778                            |
| Data redundancy                            | 5.2 (5.0)                       | 6.8 (5.4)                       | 6.3 (6.1)                       | 6.4 (4.8)                        |
| Completeness (%)                           | 98.3 (98.6)                     | 99.9 (100.0)                    | 99.9 (100.0)                    | 92.8 (98.0)                      |
| R <sub>sym</sub> (%)                       | 8.3 (44.3)                      | 12.2 (87.3)                     | 11.3 (95.7)                     | 5.0 (16.5)                       |
| I/σ <sub>i</sub>                           | 22.1 (3.2)                      | 29.2 (2.3)                      | 26.1 (2.12)                     | 47.6 (9.8)                       |
| PDB ID                                     | 3T93                            | 3T96                            | 3T9H                            | 3T9U                             |
| <b>Current Model Refinement Statistics</b> |                                 |                                 |                                 |                                  |
| Phasing                                    | MR                              | MR                              | MR                              | MR                               |
| Molecules/AU                               | 3                               | 3                               | 3                               | 3                                |
| R <sub>work</sub> /R <sub>free</sub> (%)   | 18.1/22.9                       | 18.3/21.9                       | 18.7/23.5                       | 16.8/22.2                        |
| Free R test set size (#/%)                 | 1938 (2.9)                      | 1868 (2.7)                      | 1832 (3.3)                      | 3039 (5.1)                       |
| Number of protein atoms                    | 6022                            | 6038                            | 6028                            | 5918                             |
| Number of heteroatoms                      | 35                              | 50                              | 50                              | 56                               |
| Rmsd bond length (Å)                       | .015                            | .007                            | .015                            | .022                             |
| Rmsd bond angles (°)                       | 1.54                            | 1.10                            | 1.52                            | 1.83                             |

**Supplemental Table 2**

## Structural Statistics

| <b>Structure</b>                           | <b>CNQX A452C/S652C (red)</b>                                  | <b>Glutamate V484C/E657C</b>    |
|--------------------------------------------|----------------------------------------------------------------|---------------------------------|
| Space Group                                | P2                                                             | P2 <sub>2</sub> ,2 <sub>1</sub> |
| Unit Cell (Å)                              | a=49.2 b=58.7 c=96.1<br>$\alpha=90.0, \beta=93.4, \gamma=90.0$ | a=47.2 b=114.2 c=163.8          |
| X-ray source                               | CHESS (A1)                                                     | CHESS (A1)                      |
| Wavelength (Å)                             | 0.977                                                          | 0.977                           |
| Resolution (Å)                             | 50-1.97 (2.00-1.99)                                            | 50-1.82 (1.85-1.82)             |
| Measured reflections (#)                   | 137661                                                         | 314725                          |
| Unique reflections (#)                     | 37055                                                          | 74434                           |
| Data redundancy                            | 3.6 (2.6)                                                      | 4.1 (3.5)                       |
| Completeness (%)                           | 99.6 (96.0)                                                    | 95.5 (99.8)                     |
| R <sub>sym</sub> (%)                       | 9.7 (28.7)                                                     | 7.3 (30.9)                      |
| I/ $\sigma$ <sub>i</sub>                   | 14.0 (2.4)                                                     | 33.6 (4.1)                      |
| PDB ID                                     | 3T9V                                                           | 3T9X                            |
| <b>Current Model Refinement Statistics</b> |                                                                |                                 |
| Phasing                                    | MR                                                             | MR                              |
| Molecules/AU                               | 2                                                              | 3                               |
| R <sub>work</sub> /R <sub>free</sub> (%)   | 17.8/23.8                                                      | 19.9/24.0                       |
| Free R test set size (#/%)                 | 1932 (5.2)                                                     | 1953 (2.6)                      |
| Number of protein atoms                    | 4029                                                           | 6007                            |
| Number of heteroatoms                      | 38                                                             | 35                              |
| Rmsd bond length (Å)                       | .014                                                           | .008                            |
| Rmsd bond angles (°)                       | 1.46                                                           | 1.10                            |
